# Supplementary material for: Atmospheric fate of two relevant unsaturated ketoethers: kinetics, products and mechanisms for the reaction of hydroxyl radicals with ( E )-4-methoxy-3-buten-2-one and (1 E )-1-methoxy-2-methyl-1-penten-3-one
Source: Copernicus journal article supplement (doi:10.5194/acp-20-8939-2020), 2020-07-29
Supplement: Supplementary file 1 [file acp-20-8939-2020-supplement.pdf]

Supplement of Atmos. Chem. Phys., 20, 8939–8951, 2020  
<https://doi.org/10.5194/acp-20-8939-2020-supplement>  
© Author(s) 2020. This work is distributed under  
the Creative Commons Attribution 4.0 License.

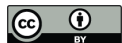

*Supplement of*

**Atmospheric fate of two relevant unsaturated ketoethers: kinetics, products and mechanisms for the reaction of hydroxyl radicals with (*E*)-4-methoxy-3-buten-2-one and (1*E*)-1-methoxy-2-methyl-1-penten-3-one**

**Rodrigo Gastón Gibilisco et al.**

*Correspondence to:* Rodrigo Gastón Gibilisco ([gibilisco@uni-wuppertal.de](mailto:gibilisco@uni-wuppertal.de)) and Iustinian Gabriel Bejan ([iustinian.bejan@uaic.ro](mailto:iustinian.bejan@uaic.ro))

The copyright of individual parts of the supplement might differ from the CC BY 4.0 License.

## Supplementary Information

### Content Summary

**Fig. S1:** Residual spectrum obtained on the TMBO + OH radical reaction (Fig. 3 trace H) focused in the frequency region between  $3400\text{ cm}^{-1}$  and  $3800\text{ cm}^{-1}$ .

**Fig. S2:** Concentrations of carbonyls formed against reacted TMBO in the reaction with OH radicals.

**Fig. S3:** Residual spectrum obtained in the MMPO + OH reaction (Fig. 4 trace H) in the frequency region between  $3400\text{ cm}^{-1}$  and  $3800\text{ cm}^{-1}$ .

**Fig. S4:** Concentrations of carbonyls formed against reacted MMPO in the reaction with OH radicals.

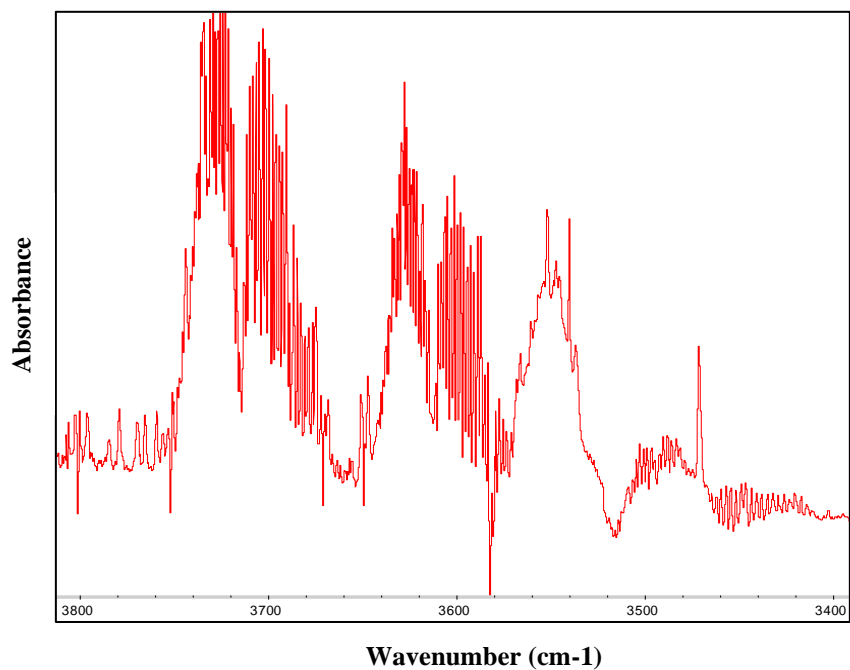

**Figure S1.** Residual spectrum obtained in the TMBO + OH reaction (Fig. 3 trace H) in the frequency region between 3400 cm<sup>-1</sup> and 3800 cm<sup>-1</sup>.

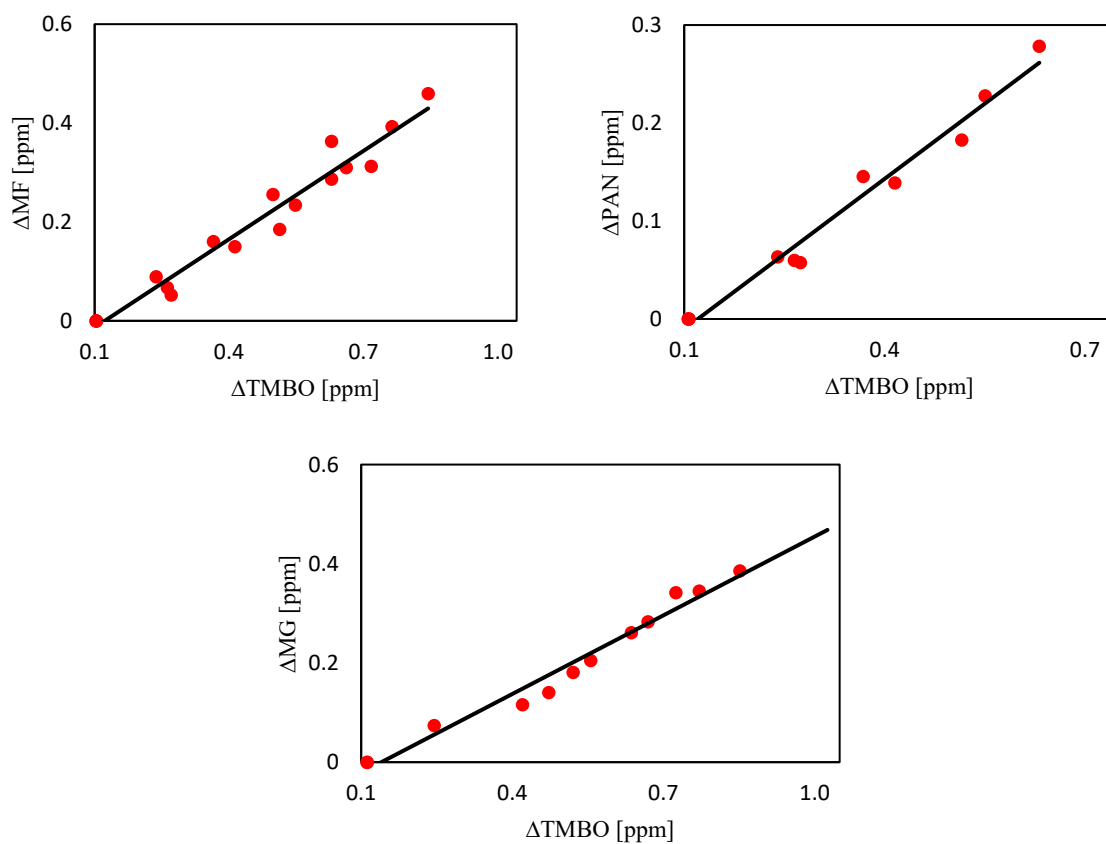

**Figure S2.** Example of the concentrations of products formed against reacted TMBO in the reaction with OH radicals.

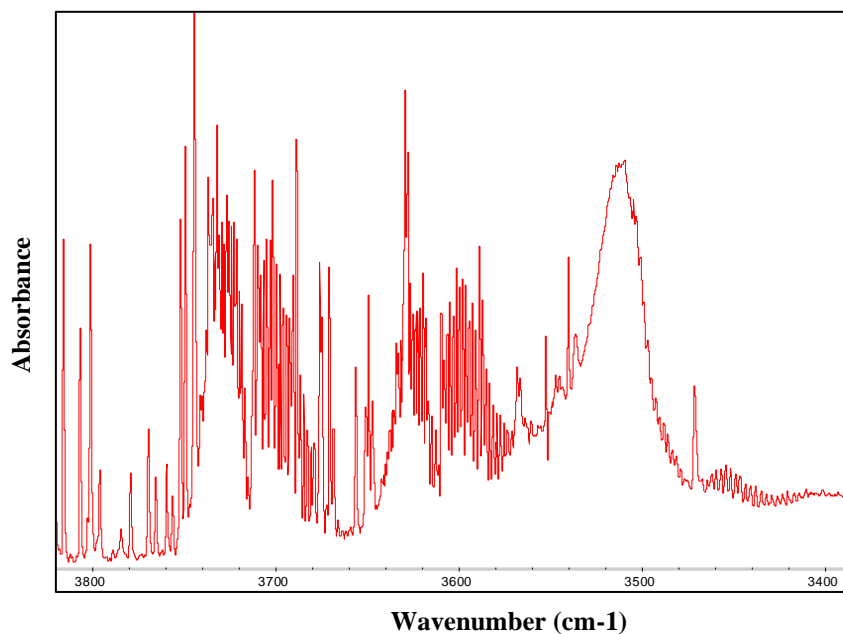

**Figure S3.** Residual spectrum obtained in the MMPO + OH reaction (Fig. 4 trace H) in the frequency region between 3400  $\text{cm}^{-1}$  and 3800  $\text{cm}^{-1}$ .

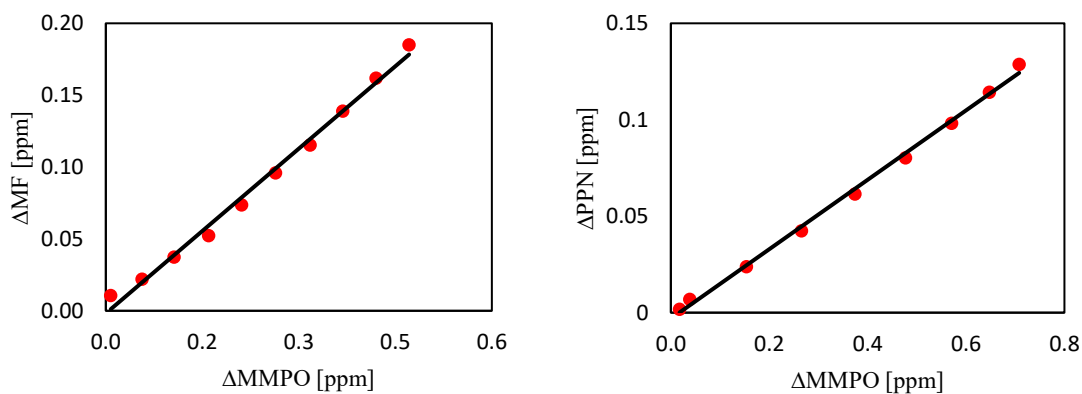

**Figure S4.** Example of the concentrations of products formed against reacted MMPO in the reaction with OH radicals.
